# Supplementary material for: Incorporating functionalized polyethylene glycol lipids into reprecipitated conjugated polymernanoparticles for bioconjugation and targeted labeling of cells
Source: Royal Society of Chemistry journal article supplement (doi:10.1039/c0nr00746c), 2010-12-13
Supplement: c0nr00746c.pdf [file c0nr00746c.pdf]

## Supporting Information

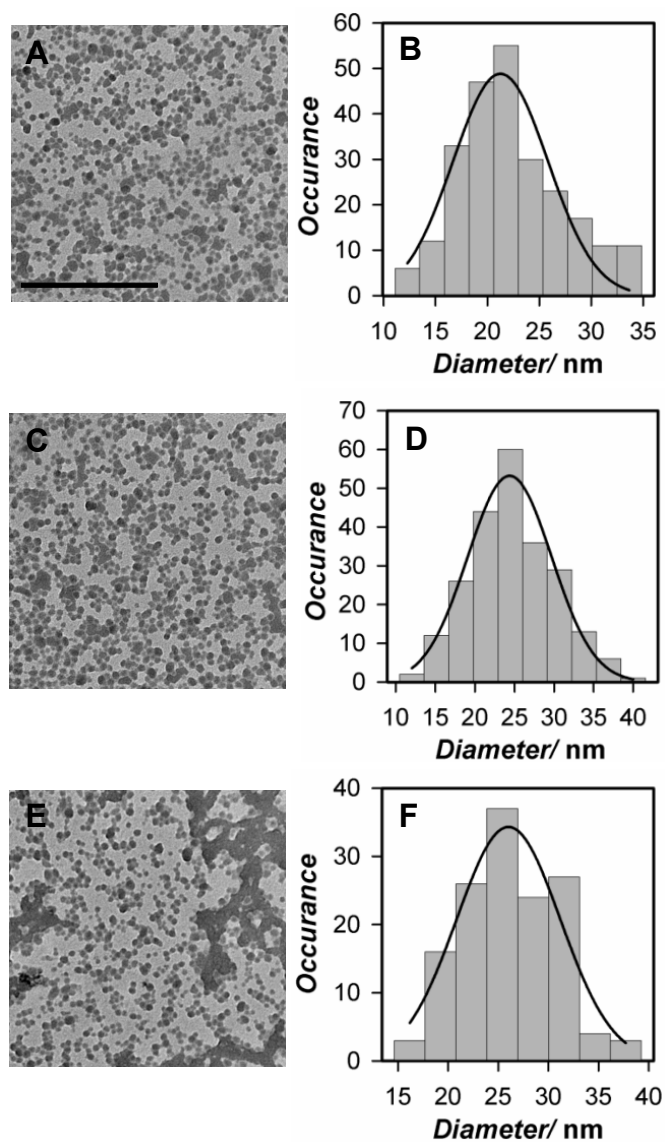

**Figure S1: Representative TEM images and/or size distribution for PEG lipid-CPNs.** (A, B) TEM image and size distribution of biotin 2000  $M_r$  PEG lipid-PFBT nanoparticles; (C, D) TEM image and size distribution histograms of methoxy 1000  $M_r$  PEG lipid-PFBT nanoparticles; (E, F) TEM image and size distribution of methoxy 550  $M_r$  PEG lipid-PFBT nanoparticles; All images shown were acquired at 120 kV on a cryostage at liquid nitrogen temperature at 120K X magnification. Scale bar is 500 nm. Histograms were fit (solid line) to a Gaussian distribution. Some clustering evident in Figure E is similar to that observed for unmodified particles (C. Szymanski et al., J. Phys. Chem. B, 2005, 109,

8543-8546.), and presumably reflects aggregation allowed by incomplete shielding of the hydrophobic CP core by shorter PEG chains.

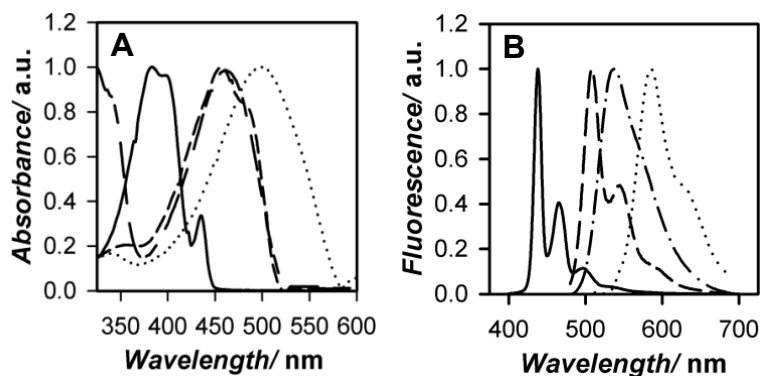

**Figure S2. Absorption and fluorescence spectra of PEG lipid-CPNs.** (A) Normalized absorption spectra for biotin PEG lipid PFO (solid line), PFPV (dashed line), PFBT (dotted dashed line), and MEH-PPV (dotted line) nanoparticles; (B) Normalized fluorescence emission spectra for biotin PEG lipid PFO (solid line), PFPV (dashed line), PFBT (dotted dashed line), and MEH-PPV (dotted line) nanoparticles. Fluorescence emission spectra were acquired using excitation maxima ( $\lambda_{\text{ex}}$  (PFO)= 384 nm;  $\lambda_{\text{ex}}$  (PFPV) = 458 nm;  $\lambda_{\text{ex}}$  (PFBT) = 460 nm;  $\lambda_{\text{ex}}$  (MEH-PPV) = 498 nm).

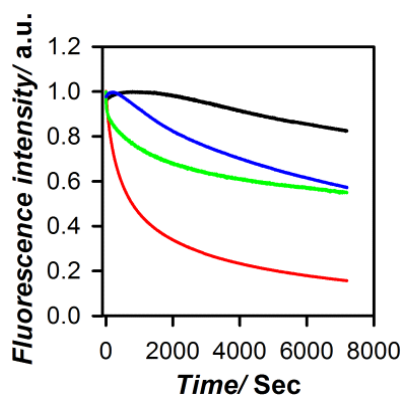

**Figure S3: Photostability of biotin PEG lipid-CPNs.** Biotin 2000 M<sub>r</sub> PEG lipid-CPNs were continuously illuminated with 250 $\mu$ W excitation light at light source ( $\lambda_{\text{ex}}$  (PFO)= 384 nm;  $\lambda_{\text{ex}}$  (PFPV) = 458 nm;  $\lambda_{\text{ex}}$

(PFBT) = 460 nm;  $\lambda_{\text{ex}}$  (MEH-PPV) = 498 nm) for 2 hours. Fluorescence emission was monitored ( $\lambda_{\text{em}}$  (PFO)= 435 nm;  $\lambda_{\text{em}}$  (PFPV) = 518 nm;  $\lambda_{\text{em}}$  (PFBT) = 545 nm;  $\lambda_{\text{em}}$  (MEH-PPV) = 590 nm) over time.

**Table S1.**

| Conjugated polymer nanoparticle (28 ppm; 2000 M <sub>r</sub> PEG) | Conjugated polymer M <sub>r</sub> (from manufacturer) | Conjugated polymer polydispersity (from manufacturer) | Diameter (DLS; nm) | Polydispersity Index (DLS) |
|-------------------------------------------------------------------|-------------------------------------------------------|-------------------------------------------------------|--------------------|----------------------------|
| Methoxy PEG lipid-PFO                                             | 29,000                                                | 3.0                                                   | 83                 | 0.20                       |
| Biotin PEG lipid-PFO                                              | 29,000                                                | 3.0                                                   | 81                 | 0.21                       |
| Carboxy PEG lipid-PFO                                             | 29,000                                                | 3.0                                                   | 81                 | 0.20                       |
| Methoxy PEG lipid-PFPV                                            | 85,000                                                | 5.4                                                   | 71                 | 0.13                       |
| Biotin PEG lipid-PFPV                                             | 85,000                                                | 5.4                                                   | 69                 | 0.09                       |
| Carboxy PEG lipid-PFPV                                            | 85,000                                                | 5.4                                                   | 69                 | 0.16                       |
| Methoxy PEG lipid-PFBT                                            | 48,000                                                | 2.7                                                   | 55                 | 0.15                       |
| Biotin PEG lipid-PFBT                                             | 48,000                                                | 2.7                                                   | 55                 | 0.14                       |
| Carboxy PEG lipid-PFBT                                            | 48,000                                                | 2.7                                                   | 58                 | 0.19                       |
| Methoxy PEG lipid-MEH-PPV                                         | 565,000                                               | 5.1                                                   | 66                 | 0.18                       |
| Biotin PEG lipid-MEH-PPV                                          | 565,000                                               | 5.1                                                   | 70                 | 0.17                       |
| Carboxy PEG lipid-MEH-PPV                                         | 565,000                                               | 5.1                                                   | 68                 | 0.17                       |
